# Supplementary material for: A Casein Kinase II Phosphorylation Site in AtYY1 Affects Its Activity, Stability, and Function in the ABA Response
Source: PubMed Central journal article supplement (PMC5346550; doi:10.3389/fpls.2017.00323), 2017-03-13

**Table S1.** Primers used in this study.

---

| <b>Primers used for qRT-PCR (5'-3')</b> |                        |
|-----------------------------------------|------------------------|
| YY1-F                                   | GAGAACATCCAGGGCATTTA   |
| YY1-R                                   | TGGCAGGCGAAGAGGTAGA    |
| CKB3-F                                  | TCCCTTTTCCTTCACATCTACT |
| CKB3-R                                  | AACATCTCACTGTTGGAAGCA  |
| CKB4-F                                  | AAGGACAAAGATTCTGTCCCTT |
| CKB4-R                                  | CAGCAGCTGATTCCACCATC   |
| ABR1-F                                  | GAAGGTAGCGGAGAAGGGA    |
| ABR1-R                                  | CGAGGTTGGTCCCCACTAA    |
| COR15A-F                                | CTTTCCACAGCGGAGCCA     |
| COR15A-R                                | CCAATGTATCTGCGGTTTCA   |
| RD29A-F                                 | TCAACACACACCAGCAGCAC   |
| RD29A-R                                 | ATCGGAAGACACGACAGGAA   |
| Actin-F                                 | TTGACTACGAGCAGGAGATGG  |
| Actin-R                                 | CAAACGAGGGCTGGAACAAG   |

---

| <b>Primers used for vector construction (5'-3')</b> |                                  |
|-----------------------------------------------------|----------------------------------|
| YY1-Bifc-F                                          | CGGGATCCATGGATCATCAAATTATC       |
| YY1-Bifc-R                                          | ACGCCTCGAGATCTTCATACTCGGTCTCT    |
| CKB3-Bifc-F                                         | CGGGATCCATGTACAAGGAACGTAGTGGA    |
| CKB3-Bifc-R                                         | ACGCCTCGAGTGGTTTGTGTACCTTGAAG    |
| CKB4-Bifc-F                                         | CGGGATCCATGTACAAGGATCGGAGTGGA    |
| CKB4-Bifc-R                                         | ACGCCTCGAGTTGTTTGTGTGTACCTTAAA   |
| YY1-3301-F                                          | CGGGATCCATGGATCATCAAATTATC       |
| YY1-3301-R                                          | ACGCACGTGCTAATCTTCATACTCGGTC     |
| YY1-P-F                                             | GGGAGCTCTGGGTGAGTGAAGACAATAATGC  |
| YY1-P-R                                             | CGGGATCCTGATTTATTTGGGTAAAGGTGGTT |

---

**Figure S1.** qRT-PCR analysis of *CKB3* (A) and *CKB4* (B) expression under ABA treatment. 10-day-old seedlings were treated with 100  $\mu$ M ABA for the indicated times (0, 3, 6, or 12 h).

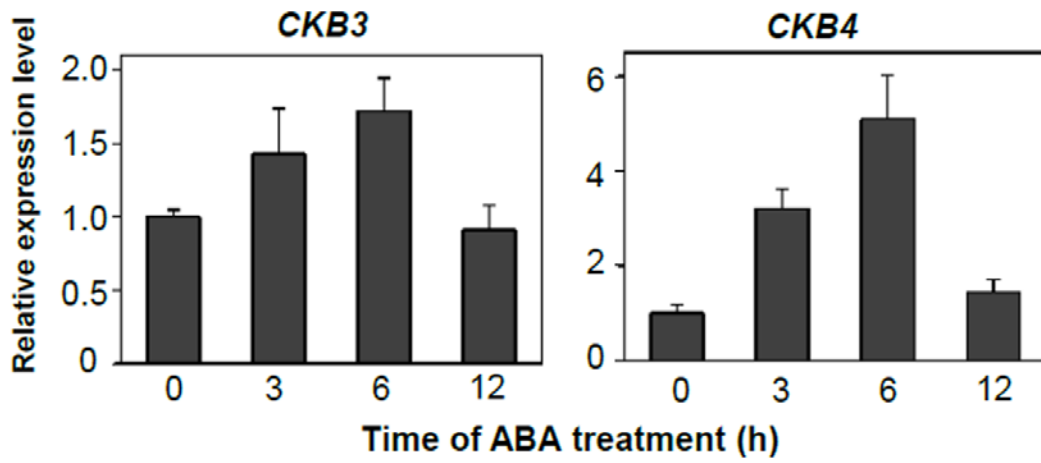

**Figure S2.** Five phosphorylated AtYY1 peptides were identified using LC-MS/MS after an *in vitro* phosphorylation assay with CKII. The amino acids labeled with a P indicate that the sites are phosphorylated. The fragment ions assigned to both y-ions and b-ions are labeled.

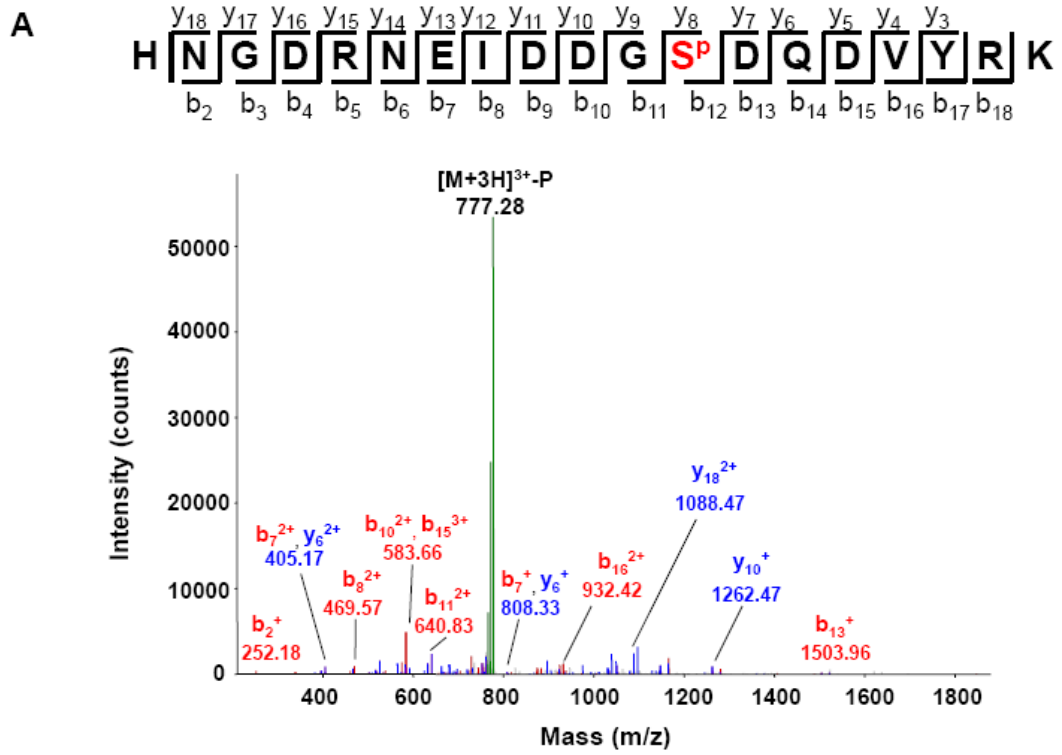

**B**

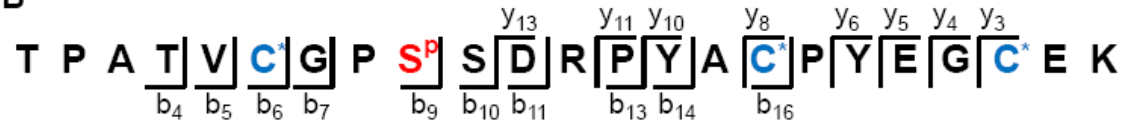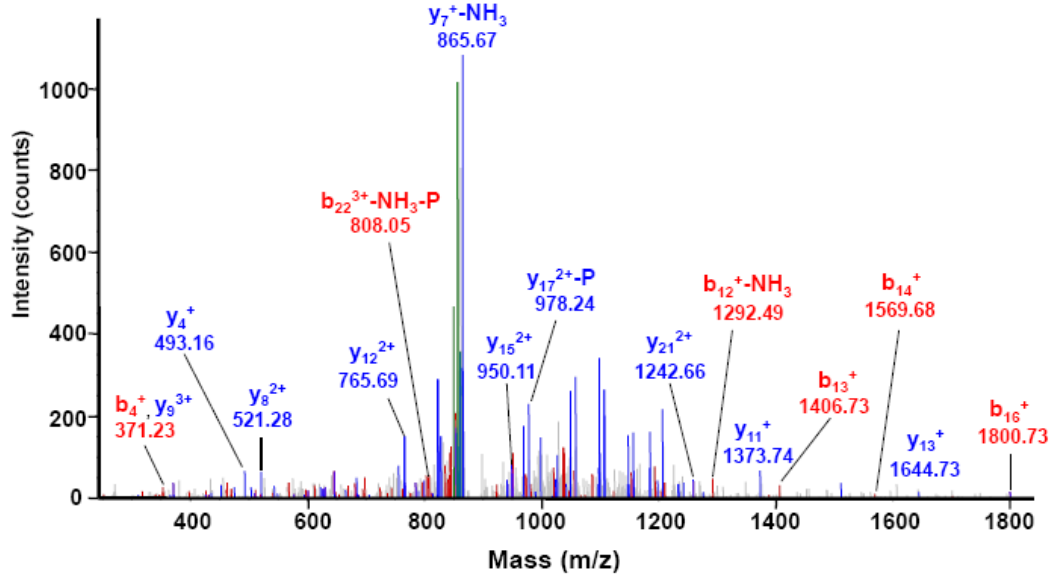

**C**

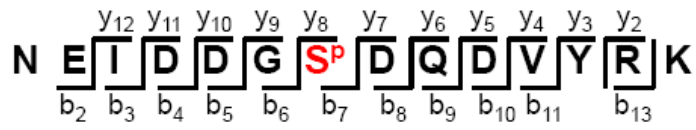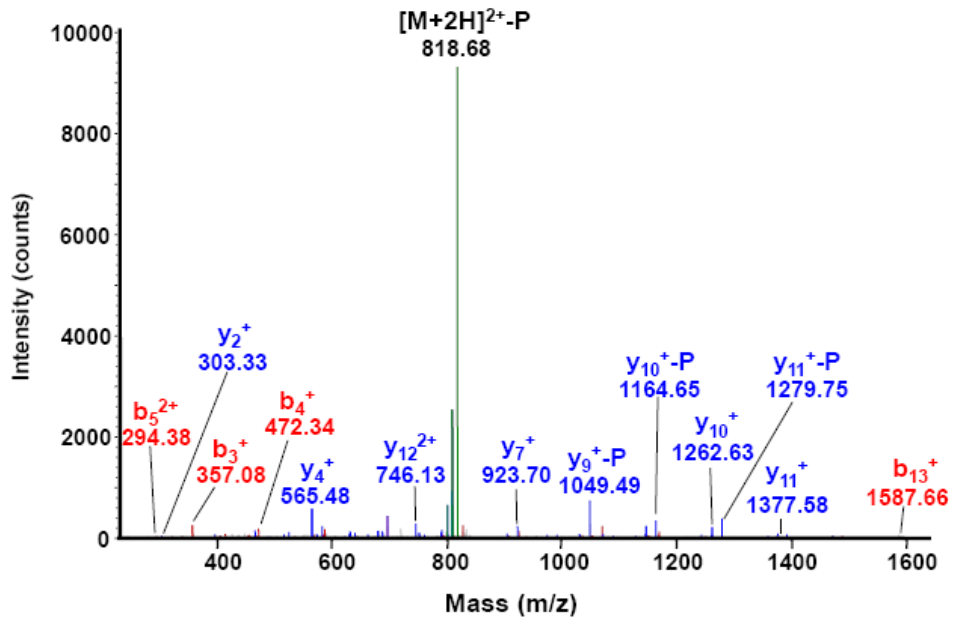

D

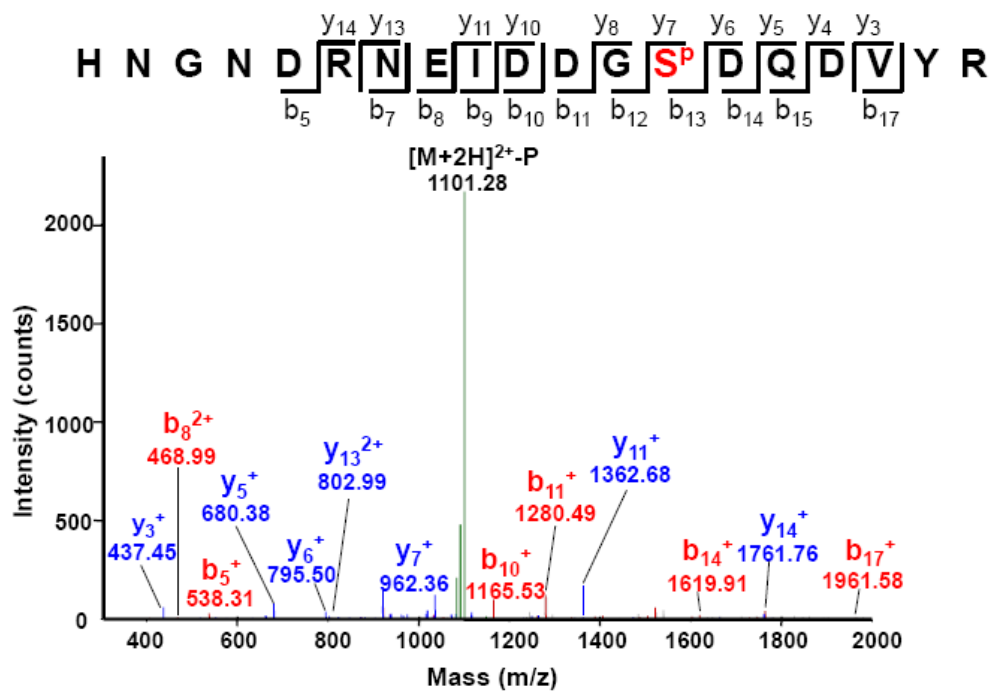

E

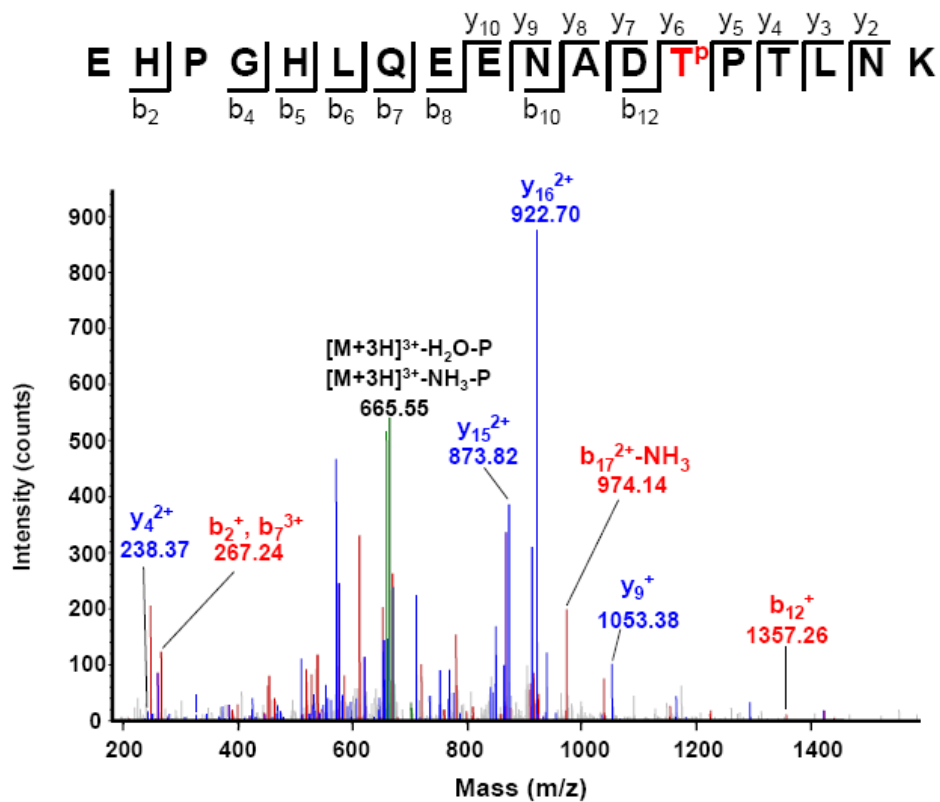

**Figure S3.** qRT-PCR analysis of *AtYY1* expression in the seedlings of WT, *pAtYY1::S284D*, *pAtYY1::S284A* and *pAtYY1::AtYY1* plants in control conditions.

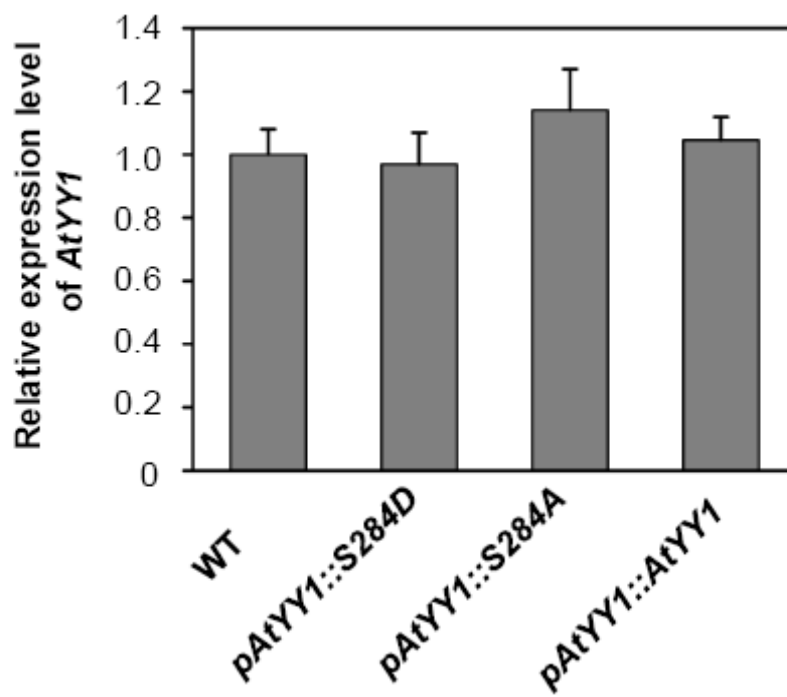

Supplement: Data_Sheet_1.pdf [file Data_Sheet_1.pdf]
